# Supplementary material for: The First Whole Genome Sequencing of Agaricus bitorquis and Its Metabolite Profiling
Source: MDPI journal article supplement (doi:10.3390/jof9040485), 2023-04-18
Supplement: s1 [file s1]

# The First Whole Genome Sequencing of *Agaricus bitorquis* and its Metabolite Profiling

Chunhua Zhao <sup>1</sup>, Xi-long Feng <sup>2</sup>, Zhen-xin Wang <sup>2</sup> and Jianzhao Qi <sup>2,\*</sup>

<sup>1</sup> Hubei Key Laboratory of Natural Medicinal Chemistry and Resource Evaluation, School of Pharmacy, Tongji Medical College, Huazhong University of Science and Technology, Wuhan, Hubei 430030, China

<sup>2</sup> Shaanxi Key Laboratory of Natural Products & Chemical Biology, College of Chemistry & Pharmacy, Northwest A&F University, Yangling, Xianyang 712100, China

\* Correspondence: qjz@nwafu.edu.cn; Tel: +86-029-87092381

# Contents

|                                                                                                                                                   |    |
|---------------------------------------------------------------------------------------------------------------------------------------------------|----|
| Table S1. Statistics of Oxford Nanopore PromethION sequencing data volume of <i>A. bitorquis</i> BH01 genome. ....                                | 1  |
| Table S2. Statistics of Illumina NovaSeq sequencing data volume information of <i>A. bitorquis</i> BH01 genome. ....                              | 2  |
| Table S3. Assembly results statistics of <i>A. bitorquis</i> BH01 genome.....                                                                     | 3  |
| Table S4. Genome size estimates for <i>A. bitorquis</i> BH01 genome. ....                                                                         | 4  |
| Table S5. Statistics of Illumina NovaSeq sequencing data mapping of <i>A. bitorquis</i> BH01 genome. ....                                         | 5  |
| Table S6. Statistics of BUSCO evaluation of <i>A. bitorquis</i> BH01 genome.....                                                                  | 6  |
| Table S7. Annotation Statistics of coding gene from the <i>A. bitorquis</i> BH01 genome. ....                                                     | 7  |
| Table S8. Statistics of non-coding RNA annotation results in <i>A. bitorquis</i> BH01 genome. ....                                                | 8  |
| Table S9. Statistics of <i>A. bitorquis</i> BH01 repetitive sequence annotation results.....                                                      | 9  |
| Table S10. Statistics of <i>A. bitorquis</i> BH01 protein-coding gene annotation.....                                                             | 10 |
| Table S11. The composition of CAZymes of <i>Agaricus</i> and edible mushrooms.....                                                                | 11 |
| Table S12. GC contents of the mitogenomes of <i>A. bisporus</i> var. <i>bisporus</i> H97 and <i>A. bitorquis</i> BH01. ....                       | 12 |
| Table S13. Analysis of orthologous genes unique to <i>A. bitorquis</i> BH01. ....                                                                 | 13 |
| Table S14. Homologous genes of <i>A. bisporus</i> fruiting body development related genes in <i>A. bitorquis</i> BH01. ....                       | 20 |
| Figure S1. ITS alignment of the strain BH01.....                                                                                                  | 21 |
| Figure S2. K-mer-Depth and K-mer Species-Frequency Distribution Plot.....                                                                         | 22 |
| Figure S3. Species distribution map of Nr database alignment to sequences. ....                                                                   | 23 |
| Figure S4. Statistical map of functional annotation classification based on GO database ....                                                      | 24 |
| Figure S5. Statistical Chart of COG Functional Annotated Classification.....                                                                      | 25 |
| Figure S6. KEGG Pathway Functional Classification Chart.....                                                                                      | 26 |
| Figure S7. Domain annotation based on the Pfam database.....                                                                                      | 27 |
| Figure S8. P450s Cluster analysis of <i>A. bitorquis</i> BH01 and other Basidiomycetes. ....                                                      | 28 |
| Figure S9. Molecular network analysis of metabolites from the fruiting bodies of <i>A. bitorquis</i> and <i>A. bisporus</i> . ....                | 29 |
| Figure S10. The LC-ESI-HRMS and LC-ESI-HRMS/MS spectrums of isolates from the fruiting bodies of <i>A. bitorquis</i> and <i>A. bisporus</i> ..... | 31 |
| Figure S11. Clustering analysis of orthologous genes unique to <i>A. bitorquis</i> BH01.....                                                      | 32 |
| References.....                                                                                                                                   | 33 |

**Table S1. Statistics of Oxford Nanopore PromethION sequencing data volume of *A. bitorquis* BH01 genome.**

| <b>Rank</b> | <b>Flag</b> | <b>TotalBase</b> | <b>TotalReads</b> | <b>MaxLen</b> | <b>AvgLen</b> | <b>N50</b> | <b>L50</b> | <b>N90</b> | <b>L90</b> | <b>meanQ</b> |
|-------------|-------------|------------------|-------------------|---------------|---------------|------------|------------|------------|------------|--------------|
| >0          | all         | 10,118,361,858   | 1,186,113         | 206,870       | 8,530.68      | 20,699     | 150,958    | 3,503      | 627,256    | 11.45        |
| >0          | pass        | 9,826,399,018    | 1,144,598         | 184,094       | 8,585.02      | 20,781     | 146,234    | 3,520      | 606,091    | 11.64        |
| >0          | fail        | 291,962,840      | 41,515            | 206,870       | 7,032.7       | 17,739     | 4,789      | 3,012      | 21,341     | 6.23         |
| >5000       | all         | 8,515,574,252    | 485,578           | 206,870       | 17,536.98     | 24,808     | 115,620    | 7,933      | 349,790    | 11.52        |
| >5000       | pass        | 8,279,606,619    | 471,207           | 184,094       | 17,571.06     | 24,871     | 112,238    | 7,948      | 339,301    | 11.68        |
| >5000       | fail        | 235,967,633      | 14,371            | 206,870       | 16,419.7      | 22,814     | 3,402      | 7,500      | 10,502     | 6.24         |
| >10000      | all         | 7,190,712,767    | 296,637           | 206,870       | 24,240.78     | 28,286     | 90,616     | 13,504     | 234,818    | 11.51        |
| >10000      | pass        | 6,996,745,125    | 288,263           | 184,094       | 24,272.08     | 28,339     | 88,078     | 13,519     | 228,156    | 11.66        |
| >10000      | fail        | 193,967,642      | 8,374             | 206,870       | 23,163.08     | 26,550     | 2,550      | 13,040     | 6,666      | 6.24         |
| >50000      | all         | 765,467,143      | 12,969            | 206,870       | 59,022.83     | 57,413     | 5,787      | 51,223     | 11,457     | 11.54        |
| >50000      | pass        | 746,612,565      | 12,659            | 184,094       | 58,978.79     | 57,395     | 5,652      | 51,218     | 11,184     | 11.67        |
| >50000      | fail        | 18,854,578       | 310               | 206,870       | 60,821.21     | 58,178     | 135        | 51,487     | 273        | 6.25         |
| >100000     | all         | 8,722,701        | 76                | 206,870       | 114,772.38    | 110,818    | 34         | 100,681    | 68         | 9.51         |
| >100000     | pass        | 7,935,511        | 70                | 184,094       | 113,364.44    | 110,818    | 32         | 100,533    | 63         | 9.89         |
| >100000     | fail        | 787,190          | 6                 | 206,870       | 131,198.33    | 110,326    | 3          | 102,390    | 6          | 5.08         |

**Rank** is the gradient of data length, **>0** is that all data; **Flag** is data type, **all** is all sequencing data, **pass** is effective sequencing data, **fail** is filtration data; **TotalBase** is the number of base; **TotalReads** is the number of reads; **MaxLen** is maximum length of data; **AvgLen** is average length of data; **N50** is N50 of data, all reads are summed in order from long to short, and when additive length up to half of all reads total length, the last read length added is N50; **L50** is L50 of data, all reads are accumulated in turn ranking in order from long to short, when additive length up to half of all reads total length, the number of sequences is L50; **N90** is N90 of data, algorithm the same as N50; **L90** is L90 of data, algorithm the same as L50; **meanQ** is mean quality value.

**Table S2. Statistics of Illumina NovaSeq sequencing data volume information of *A. bitorquis* BH01 genome.**

| <b>Sample_name</b> | <b>Total_reads</b> | <b>Total_bases</b> | <b>GC_content</b> | <b>Q20</b> | <b>Q30</b> |
|--------------------|--------------------|--------------------|-------------------|------------|------------|
| rawdata            | 34,235,978         | 5,135,396,700      | 45.19%            | 97.71%     | 93.35%     |
| cleandata          | 34,235,978         | 5,135,396,700      | 45.19%            | 97.71%     | 93.35%     |

**Sample name** is data type; **Total\_reads** is sequencing reads number; **Total\_bases** is total sequencing base number; **GC\_Content** is G/C base number as a percentage of total base number; **Q20**、**Q30** respectively are Phred value greater than 20、30 base as a percentage of total base.

**Table S3. Assembly results statistics of *A. bitorquis* BH01 genome.**

| <b>Item</b>               | <b>Value</b> |
|---------------------------|--------------|
| Total_length(bp)          | 32,345,193   |
| Total_length_withoutN(bp) | 32,345,193   |
| Total_number              | 22           |
| GC_content(%)             | 46.05        |
| N50(bp)                   | 2,052,213    |
| N90(bp)                   | 718,652      |
| Average(bp)               | 1,470,236.05 |
| Median(bp)                | 1,485,428.50 |
| Min(bp)                   | 113,555      |
| Max(bp)                   | 3,210,751    |

**Total\_length** is the length of the assembly; **Total\_length\_withoutN** is the length of the assembly without gaps; **Total\_number** is the number of sequences assembled; **GC\_content** is the GC content; **N50** is the N50 of the data, all sequences are sorted from longest to shortest and then added in order, when the summed length reaches half of the total length, the last added sequence length is N50; **N90** is the same as N50; **Average** is the average length; **Median** is the median length; **Min** is the minimum length; **Max** is the maximum length.

**Table S4. Genome size estimates for *A. bitorquis* BH01 genome.**

| <b>Item</b>           | <b>Number</b> |
|-----------------------|---------------|
| Heterozygosity        | 0.665%        |
| Genome Haploid Length | 33,542,299 bp |
| Genome Repeat Length  | 10,787,297 bp |
| Genome Unique Length  | 22,755,002 bp |
| Model Fit             | 97.543%       |
| Read Error Rate       | 0.049%        |

**Table S5. Statistics of Illumina NovaSeq sequencing data mapping of *A. bitorquis* BH01 genome.**

| <b>Type</b>   | <b>Number</b> |
|---------------|---------------|
| map_rate      | 92.19%        |
| Average_depth | 144.95        |
| Coverage      | 99.83%        |

**map\_rate** is Illumina NovaSeq sequencing data mapping rates; **Average\_depth** is average coverage depth; **Coverage** is coverage rate.

**Table S6. Statistics of BUSCO evaluation of *A. bitorquis* BH01 genome.**

| Item                                | Number | Percent (%) |
|-------------------------------------|--------|-------------|
| Complete BUSCOs (C)                 | 688    | 90.8        |
| Complete and single-copy BUSCOs (S) | 678    | 89.4        |
| Complete and duplicated BUSCOs (D)  | 10     | 1.3         |
| Fragmented BUSCOs (F)               | 14     | 1.8         |
| Missing BUSCOs (M)                  | 56     | 7.4         |
| Total BUSCO groups searched         | 758    | 100.0       |



**Table S7. Annotation Statistics of coding gene from the *A. bitorquis* BH01 genome.**

| <b>Type</b>              | <b>Number</b> |
|--------------------------|---------------|
| Total number of gene     | 10,028        |
| Average of mRNA length   | 1,883.52      |
| Average of cds length    | 1,389.56      |
| Average of exon number   | 7.71          |
| Average of exon length   | 180.16        |
| Average of intron length | 73.58         |
| Total number of exon     | 77,347        |
| Total number of intron   | 67,319        |
| Total intron length      | 4,953,275     |

**The total number of gene** is the total number of genes; **the average of mRNA\_length** is the average length of mRNA; **the average of cds\_length** is the average length of CDS; **the average of exon\_number** is the average number of exons per gene. **the average of exon\_length** is the average exon length; **the average of intron\_length** is the average intron length; **the total number of exon** is the total number of exons; **the total number of intron** is the total number of introns; **the total intron length** is the total intron length.

**Table S8. Statistics of non-coding RNA annotation results in *A. bitorquis* BH01 genome.**

| <b>Class</b> | <b>number</b> | <b>totalLen(bp)</b> | <b>meanLen(bp)</b> |
|--------------|---------------|---------------------|--------------------|
| rRNA         | 25            | 35,291              | 1,411              |
| sRNA         | 1             | 341                 | 341                |
| snRNA        | 11            | 1,408               | 128                |
| tRNA         | 109           | 9,205               | 84                 |

**rRNA** is ribosomal RNA; **tRNA** is transport RNA; **sRNA** is small regulatory RNA; **snRNA** is nucleolar small RNA. **totalLen** and **meanLen** are the total length and mean length.

**Table S9. Statistics of *A. bitorquis* BH01 repetitive sequence annotation results.**

| Item           | Subfamily | Number | Length(bp) | Coverage |
|----------------|-----------|--------|------------|----------|
| SINE           | /         | 6      | 386        | 0.00%    |
| LINE           | /         | 1,041  | 1,530,220  | 4.73%    |
| LTR            | /         | 2,613  | 3,934,278  | 12.16%   |
| LTR            | Gypsy     | 1,379  | 2,495,454  | 7.72%    |
| LTR            | Copia     | 1,158  | 1,434,206  | 4.43%    |
| DNA            | /         | 355    | 104,334    | 0.32%    |
| Satellite      | /         | 9      | 719        | 0.00%    |
| Simple_repeat  | /         | 3,378  | 127,786    | 0.40%    |
| Low_complexity | /         | 624    | 30,758     | 0.10%    |
| Other          | /         | 33     | 2,719      | 0.01%    |
| Unknown        | /         | 3,679  | 2,046,343  | 6.33%    |
| Total          | /         | 11,738 | 7,694,206  | 23.79%   |

**SINE** is short scattered element; **LINE** is Long scattered element; **LTR** is long terminal repetition, mainly include two types, Gypsy and Copia; **DNA** is transposons; **Satellite** is satellite repetitive sequence; **Low\_complexity** is Low\_complexity repetition; **Other** is other types repetition; **Unknown** is unknown repetitive sequence; **Total** is total repetitive sequence.

**Table S10. Statistics of *A. bitorquis* BH01 protein-coding gene annotation.**

| Item         | Count  | Percentage |
|--------------|--------|------------|
| All          | 10,028 | 100%       |
| Annotation   | 9,253  | 92.27%     |
| Uniprot      | 5,058  | 50.44%     |
| Pfam         | 7,023  | 70.03%     |
| Refseq       | 3,484  | 34.74%     |
| Nr           | 9,216  | 91.90%     |
| Interproscan | 6,991  | 69.71%     |
| GO           | 5,021  | 50.07%     |
| KEGG         | 3,816  | 38.05%     |
| Pathway      | 2,304  | 22.98%     |
| COG          | 976    | 9.73%      |

Annotation is the gene with at least one annotation; Uniprot is the gene annotated to the Uniprot database; Pfam is the gene that is annotated to the Pfam database; Refseq is the gene that is annotated to the Refseq database; Nr is the gene that is annotated to the Nr database; Interproscan is the gene that is annotated to the Interproscan GO is the gene annotated to the GO database; KEGG is the gene that is annotated to the KEGG database; Pathway is the gene that is annotated to the KEGG Pathway database; COG is the gene that is annotated to the COG database.

**Table S11. The composition of CAZymes of *Agaricus* and edible mushrooms.**

| <b>Species</b>                                     | <b>GT</b> | <b>CBM</b> | <b>PL</b> | <b>CE</b> | <b>AA</b> | <b>GH</b> |
|----------------------------------------------------|-----------|------------|-----------|-----------|-----------|-----------|
| <i>Agaricus bisporus</i> BH01                      | 4         | 9          | 8         | 14        | 22        | 66        |
| <i>Agaricus bisporus</i> var <i>burnettii</i> H119 | 6         | 8          | 7         | 14        | 32        | 69        |
| <i>Oudemansiella raphanipes</i> _CGG-A-s2          | 8         | 7          | 21        | 26        | 89        | 153       |
| <i>Pleurotus ostreatus</i> PC9                     | 2         | 20         | 20        | 19        | 83        | 121       |
| <i>Lyophyllum decastes</i> _LRG-d1-5               | 5         | 17         | 17        | 21        | 64        | 114       |
| <i>Stropharia rugosoannulata</i> _A15              | 2         | 11         | 6         | 29        | 80        | 105       |
| <i>Pleurotus giganteus</i> _zhudugu2               | 4         | 15         | 11        | 14        | 81        | 107       |
| <i>Lentinula edodes</i> Lenedo1                    | 2         | 10         | 8         | 15        | 40        | 131       |
| <i>Morchella sextelata</i> SCLS                    | 4         | 4          | 23        | 23        | 50        | 100       |
| <i>Cyclocybe aegerita</i> AAE3                     | 2         | 11         | 10        | 17        | 63        | 89        |
| <i>Armillaria mellea</i> ELDO17                    | 1         | 11         | 15        | 25        | 48        | 90        |
| <i>Hericium coralloides</i> FP-101451              | 1         | 5          | 3         | 16        | 34        | 87        |
| <i>Lactarius deliciosus</i> EDB83                  | 6         | 3          | 5         | 7         | 47        | 64        |
| <i>Paxillus involutus</i> ATCC 200175              | 4         | 3          | 5         | 8         | 29        | 63        |
| <i>Cordyceps militaris</i> CM01                    | 3         | 3          | 3         | 6         | 22        | 71        |
| <i>Boletus edulis</i> BED1                         | 3         | 1          | 1         | 7         | 19        | 74        |
| <i>Grifola frondosa</i> 9006-11                    | 2         | 2          | 3         | 5         | 37        | 51        |
| <i>Sparassis crispa</i> SCP_1.1                    | 3         | 0          | 5         | 4         | 15        | 58        |

Table S12. GC contents of the mitogenomes of *A. bisporus* var. *bisporus* H97 and *A. bitorquis* BH01.

| Gene         | <i>Agaricus bisporus</i> var.<br><i>bisporus</i> H97 | <i>Agaricus bitorquis</i><br>BH01 |
|--------------|------------------------------------------------------|-----------------------------------|
| <i>atp6</i>  | 27.17%                                               | 27.05%                            |
| <i>atp8</i>  | 20.13%                                               | 20.13%                            |
| <i>atp9</i>  | 37.39%                                               | 36.49%                            |
| <i>cob</i>   | 31.30%                                               | 31.64%                            |
| <i>cox1</i>  | 34.66%                                               | 34.85%                            |
| <i>cox2</i>  | 31.40%                                               | 31.66%                            |
| <i>cox3</i>  | 34.31%                                               | 33.83%                            |
| <i>nad1</i>  | 29.61%                                               | 29.80%                            |
| <i>nad2</i>  | 24.35%                                               | 24.33%                            |
| <i>nad3</i>  | 29.17%                                               | 29.17%                            |
| <i>nad4</i>  | 28.19%                                               | 28.04%                            |
| <i>nad4L</i> | 23.22%                                               | 23.22%                            |
| <i>nad5</i>  | 29.07%                                               | 29.03%                            |
| <i>nad6</i>  | 25.65%                                               | 25.65%                            |
| <i>rps3</i>  | 23.13%                                               | 23.13%                            |

**Table S13. Analysis of orthologous genes unique to *A. bitorquis* BH01.**

| Protein ID | Identify | E-Value | function                                         | Accession    |
|------------|----------|---------|--------------------------------------------------|--------------|
| g7821.t1   |          |         |                                                  |              |
| g7821.t2   |          |         |                                                  |              |
| g7839.t1   | 34.56%   | 3e-62   | kinase-like protein                              | KAF9447093.1 |
| g7840.t1   | 37.22%   | 5e-133  | kinase-like protein                              | KAF9444021.1 |
| g7841.t1   | 31.33%   | 3e-63   | Mitogen-activated protein kinase YODA            | KXN91139.1   |
| g7847.t1   | 96.43%   | 3e-28   | hypothetical protein                             | EKV48620.1   |
| g7852.t1   | 37.22%   | 2e-131  | kinase-like protein                              | KAF9444021.1 |
| g7853.t1   | 30.95%   | 4e-63   | Mitogen-activated protein kinase YODA            | KXN91139.1   |
| g7853.t2   | 28.73%   | 4e-46   | Mitogen-activated protein kinase YODA            | KXN91139.1   |
| g7859.t1   | 96.43%   | 3e-28   | hypothetical protein                             | EKV48620.1   |
| g7864.t1   | 58.57%   | 2e-61   | hypothetical protein                             | EKV48615.1   |
| g7864.t2   | 37.70%   | 8e-56   | Mitochondrial substrate carrier family protein S | KXN81264.1   |
| g7896.t1   | 82.18%   | 0.0     | hypothetical protein                             | KAF7782841.1 |
| g7902.t1   | 82.65%   | 9e-171  | hypothetical protein                             | KAF7782841.1 |
| g7979.t1   | 75.12%   | 8e-106  | hypothetical protein                             | KAF7783187.1 |
| g7979.t2   | 72.46%   | 2e-135  | hypothetical protein                             | KAF7783187.1 |
| g8332.t1   | 95.42%   | 6e-167  | hypothetical protein                             | KAF7782468.1 |
| g8332.t2   | 93.09%   | 2e-167  | hypothetical protein                             | KAF7782468.1 |
| g8413.t1   |          |         |                                                  |              |
| g8413.t2   | 46.94%   | 0.022   | Git3 domain-containing protein                   | KAF7365684.1 |
| g8494.t1   | 47.52%   | 5e-17   | transcriptional regulator family                 | KAF7782328.1 |
| g8494.t2   | 38.55%   | 1e-20   | transcriptional regulator family                 | KAF7782328.1 |
| g8550.t1   | 47.98%   | 1e-35   | 5',5'''-P-1, P-4-tetraphosphate phosphorylase 2  | KXN91000.1   |
| g8550.t2   | 48.26%   | 2e-37   | 5',5'''-P-1, P-4-tetraphosphate phosphorylase 2  | KXN91000.1   |
| g8633.t1   | 46.10%   | 9e-74   | NAD(P)-binding protein                           | KAF9447064.1 |
| g8633.t2   | 46.29%   | 2e-72   | NAD(P)-binding protein                           | KAF9447064.1 |
| g8676.t1   |          |         |                                                  |              |
| g8676.t2   |          |         |                                                  |              |
| g8738.t1   |          |         |                                                  |              |
| g8738.t2   |          |         |                                                  |              |
| g8786.t1   | 43.37%   | 4e-08   | hypothetical protein                             | EKV41984.1   |
| g8786.t2   |          |         |                                                  |              |
| g8786.t3   | 46.61%   | 1e-10   | hypothetical protein                             | EKV41986.1   |
| g8787.t1   | 43.97%   | 2e-17   | hypothetical protein                             | KAF7782961.1 |
| g8787.t2   | 43.97%   | 2e-16   | hypothetical protein                             | KAF7782961.1 |
| g3916.t1   |          |         |                                                  |              |
| g3947.t1   | 40.79%   | 0.044   | high mobility group protein HMGI-C               | KAG7320396.1 |
| g3947.t2   | 42.11%   | 0.008   | high mobility group                              | KAG7320396.1 |

|          |        |        |                                                               |              |
|----------|--------|--------|---------------------------------------------------------------|--------------|
| g4955.t1 | 90.04% | 2e-174 | protein HMGI-C                                                |              |
| g4955.t2 | 90.38% | 3e-174 | hypothetical protein                                          | EKV50900.1   |
| g4988.t1 |        |        | hypothetical protein                                          | EKV50900.1   |
| g4988.t2 |        |        |                                                               |              |
| g5012.t1 |        |        |                                                               |              |
| g5012.t2 |        |        |                                                               |              |
| g5041.t1 | 60.37% | 4e-56  | hypothetical protein                                          | KAF7763932.1 |
| g5044.t1 | 61.33% | 3e-22  | retrovirus-related pol<br>polyprotein                         | EDR06651.1   |
| g5076.t1 | 90.22% | 1e-47  | transcriptional regulator<br>family: GATA type zinc<br>finger | KAF7775615.1 |
| g5076.t2 | 91.21% | 2e-49  | transcriptional regulator<br>family: GATA type zinc<br>finger | KAF7775615.1 |
| g5122.t1 |        |        |                                                               |              |
| g5122.t2 |        |        |                                                               |              |
| g5170.t1 | 72.93% | 5e-50  | Cullin                                                        | TRM67470.1   |
| g5177.t1 | 74.24% | 4e-53  | ubiquitin-protein ligase                                      | KAH6902807.1 |
| g5862.t1 |        |        |                                                               |              |
| g6015.t1 | 68.35% | 4e-24  | hypothetical protein                                          | EKM78018.1   |
| g6085.t1 | 54.00% | 3e-75  | hypothetical protein                                          | EKM76077.1   |
| g6085.t2 | 54.80% | 2e-76  | hypothetical protein                                          | EKM76077.1   |
| g6096.t1 |        |        |                                                               |              |
| g6096.t2 |        |        |                                                               |              |
| g1480.t1 | 84.58% | 6e-122 | hypothetical protein                                          | KAF7768336.1 |
| g1480.t2 | 81.53% | 4e-75  | hypothetical protein                                          | KAF7768336.1 |
| g1682.t1 | 61.82% | 3e-12  | beta-<br>lactamase/transpeptidase-<br>like protein            | KAF9449778.1 |
| g1682.t2 | 61.82% | 5e-12  | beta-<br>lactamase/transpeptidase-<br>like protein            | KAF9449778.1 |
| g1776.t2 | 88.02% | 1e-119 | hypothetical protein                                          | KAF7768115.1 |
| g1776.t3 | 87.78% | 3e-109 | hypothetical protein                                          | KAF7768115.1 |
| g1955.t1 | 37.96% | 8e-63  | hypothetical protein                                          | EKV45633.1   |
| g1955.t2 | 38.20% | 5e-63  | hypothetical protein                                          | EKV45633.1   |
| g1959.t1 | 73.75% | 3e-78  | hypothetical protein                                          | EKM79149.1   |
| g1959.t2 | 71.93% | 2e-81  | hypothetical protein                                          | EKM79149.1   |
| g7155.t1 | 79.11% | 0.0    | phosphoglycerate mutase-<br>like protein                      | KAF9449257.1 |
| g7155.t2 | 78.23% | 0.0    | phosphoglycerate mutase-<br>like protein                      | KAF9449257.1 |
| g7209.t1 | 70.24% | 1e-28  | hypothetical protein                                          | EKV48690.1   |
| g7209.t2 | 66.67% | 1e-38  | hypothetical protein                                          | EKV49576.1   |
| g7245.t1 | 36.09% | 6e-51  | S-adenosyl-L-methionine-<br>dependent<br>methyltransferase    | KAF9445131.1 |
| g7258.t1 | 36.88% | 2e-51  | S-adenosyl-L-methionine-<br>dependent<br>methyltransferase    | KAF9445131.1 |
| g7344.t1 | 72.40% | 7e-167 | CAZyme family AA3                                             | KAF7771600.1 |
| g7344.t2 | 72.40% | 5e-165 | CAZyme family AA3                                             | KAF7771600.1 |



|          |        |        |                                                               |              |
|----------|--------|--------|---------------------------------------------------------------|--------------|
| g7427.t1 |        |        |                                                               |              |
| g7427.t2 |        |        |                                                               |              |
| g7440.t1 | 50.71% | 3e-113 | beta-lactamase-like protein                                   | TFK40308.1   |
| g7440.t2 | 50.86% | 3e-115 | beta-lactamase-like protein                                   | TFK40308.1   |
| g7688.t1 | 70.80% | 2e-113 | PIN domain-like protein                                       | KAF9451879.1 |
| g7688.t2 | 70.40% | 1e-112 | PIN domain-like protein                                       | KAF9451879.1 |
| g7733.t1 |        |        |                                                               |              |
| g7735.t1 |        |        |                                                               |              |
| g7736.t1 | 76.92% | 4e-33  | hypothetical protein                                          | EKV48961.1   |
| g7740.t1 | 47.46% | 0.039  | hypothetical protein                                          | KAF8239668.1 |
| g2129.t1 |        |        |                                                               |              |
| g2130.t1 | 73.13% | 0.0    | HCO <sub>3</sub> transporter family-domain-containing protein | KAF8158230.1 |
| g2135.t1 | 30.47% | 2e-33  | Hypothetical protein                                          | KAJ3566546.1 |
| g2136.t1 | 79.58% | 1e-99  | Hypothetical protein                                          | KAF7763888.1 |
| g2138.t1 |        |        |                                                               |              |
| g2145.t1 | 84.21% | 3e-106 | Hypothetical protein                                          | KAF7763888.1 |
| g2147.t1 | 46.75% | 5e-08  | Hypothetical protein                                          | KAF5382182.1 |
| g2150.t1 |        |        |                                                               |              |
| g2151.t1 | 86.76% | 0.0    | Hypothetical protein                                          | KAF7762649.1 |
| g2251.t1 | 42.51% | 1e-37  | Hypothetical protein                                          | KAF5348801.1 |
| g2251.t2 | 41.09% | 6e-35  | Hypothetical protein                                          | KAF5348801.1 |
| g2322.t1 | 84.67% | 0.0    | Hypothetical protein                                          | KAF7762180.1 |
| g2322.t2 | 85.46% | 0.0    | Hypothetical protein                                          | KAF7762180.1 |
| g2333.t1 | 89.30% | 8e-116 | Hypothetical protein                                          | KAF7762169.1 |
| g2333.t2 | 87.43% | 1e-113 | hypothetical protein                                          | KAF7762169.1 |
| g2360.t1 |        |        |                                                               |              |
| g2360.t2 |        |        |                                                               |              |
| g2447.t1 |        |        |                                                               |              |
| g2447.t2 |        |        |                                                               |              |
| g6310.t1 | 81.43% | 7e-126 | hypothetical protein                                          | KAF7770709.1 |
| g6312.t1 | 79.31% | 6e-101 | hypothetical protein                                          | KAF7770709.1 |
| g6313.t1 |        |        |                                                               |              |
| g6604.t1 | 55.24% | 3e-70  | transcriptional regulator family                              | KAF7770379.1 |
| g6604.t2 | 51.14% | 2e-77  | transcriptional regulator family                              | KAF7770379.1 |
| g6693.t1 | 66.89% | 6e-134 | ZIP-like iron-zinc transporter                                | KAF8817477.1 |
| g6693.t2 | 66.56% | 7e-131 | ZIP-like iron-zinc transporter                                | KAF8817477.1 |
| g6699.t1 |        |        |                                                               |              |
| g6699.t2 |        |        |                                                               |              |
| g6699.t3 |        |        |                                                               |              |
| g3341.t1 |        |        |                                                               |              |
| g3341.t2 |        |        |                                                               |              |
| g3342.t1 |        |        |                                                               |              |
| g3342.t2 |        |        |                                                               |              |
| g3344.t1 |        |        |                                                               |              |
| g3344.t2 |        |        |                                                               |              |
| g3344.t3 |        |        |                                                               |              |
| g3344.t4 |        |        |                                                               |              |

|          |        |        |                                       |              |
|----------|--------|--------|---------------------------------------|--------------|
| g3439.t1 | 67.77% | 1e-113 | CAZyme family AA3                     | KAF7771600.1 |
| g3439.t2 | 71.73% | 5e-153 | CAZyme family AA3                     | KAF7771600.1 |
| g3489.t1 | 60.00% | 4e-17  | Alpha/Beta hydrolase protein          | TFK42369.1   |
| g3489.t2 | 64.63% | 3e-29  | Alpha/Beta hydrolase protein          | KAF8163516.1 |
| g3691.t1 |        |        |                                       |              |
| g3691.t2 |        |        |                                       |              |
| g3906.t1 | 29.91% | 1e-04  | intersectin-1 isoform X1              | KAF0758251.1 |
| g2548.t1 | 76.01% | 0.0    | hypothetical protein                  | KAF7759812.1 |
| g2548.t2 | 75.77% | 0.0    | hypothetical protein                  | KAF7759812.1 |
| g2558.t1 | 84.85% | 2e-28  | hypothetical protein                  | KAF7763439.1 |
| g2558.t2 | 63.44% | 2e-28  | hypothetical protein                  | KAF7763439.1 |
| g2568.t1 | 77.46% | 2e-136 | glycoside hydrolase family 27 protein | KAF9448138.1 |
| g2568.t2 | 77.46% | 2e-136 | glycoside hydrolase family 27 protein | KAF9448138.1 |
| g2577.t1 |        |        |                                       |              |
| g2577.t2 |        |        |                                       |              |
| g2583.t1 |        |        |                                       |              |
| g2583.t2 |        |        |                                       |              |
| g2618.t1 | 66.90% | 2e-46  | hypothetical protein                  | KAF7763457.1 |
| g2618.t2 | 61.54% | 1e-59  | hypothetical protein                  | KAF7763457.1 |
| g2629.t1 |        |        |                                       |              |
| g2629.t2 |        |        |                                       |              |
| g2645.t1 |        |        |                                       |              |
| g2645.t2 |        |        |                                       |              |
| g2669.t1 |        |        |                                       |              |
| g2669.t2 |        |        |                                       |              |
| g2670.t1 |        |        |                                       |              |
| g2670.t2 |        |        |                                       |              |
| g2672.t1 | 66.26% | 1e-60  | hypothetical protein                  | KAF7763496.1 |
| g2672.t2 | 52.80% | 3e-56  | hypothetical protein                  | KAF7763496.1 |
| g2672.t3 | 60.44% | 3e-69  | hypothetical protein                  | KAF7763496.1 |
| g2826.t1 | 37.78% | 0.003  | other/BUB protein kinase              | KAF8068848.1 |
| g2826.t2 | 37.78% | 0.004  | other/BUB protein kinase              | KAF8068848.1 |
| g2826.t3 | 37.78% | 0.005  | other/BUB protein kinase              | KAF8068848.1 |
| g2830.t1 |        |        |                                       |              |
| g2830.t2 |        |        |                                       |              |
| g2947.t1 | 40.16% | 8e-20  | hypothetical protein                  | KAF7764071.1 |
| g2948.t1 | 42.47% | 3e-09  | hypothetical protein                  | KAF3936583.1 |
| g2950.t1 |        |        |                                       |              |
| g2950.t2 |        |        |                                       |              |
| g501.t1  | 50.31% | 2e-46  | hypothetical protein                  | KAG6815639.1 |
| g562.t1  |        |        |                                       |              |
| g562.t2  |        |        |                                       |              |
| g572.t1  | 54.29% | 6e-49  | hypothetical protein                  | KAF7785220.1 |
| g572.t2  | 54.29% | 5e-48  | hypothetical protein                  | KAF7785220.1 |
| g572.t3  | 54.29% | 6e-50  | hypothetical protein                  | KAF7785220.1 |
| g574.t1  | 54.14% | 1e-42  | hypothetical protein                  | KAF7785220.1 |
| g574.t2  | 54.67% | 7e-41  | hypothetical protein                  | KAF7785220.1 |
| g681.t1  | 35.28% | 1e-42  | hypothetical protein                  | KAF9449339.1 |

|          |        |        |                                                                              |              |
|----------|--------|--------|------------------------------------------------------------------------------|--------------|
| g681.t2  | 34.97% | 9e-42  | hypothetical protein                                                         | KAF9449339.1 |
| g692.t1  |        |        |                                                                              |              |
| g698.t1  |        |        |                                                                              |              |
| g698.t2  |        |        |                                                                              |              |
| g738.t1  | 62.70% | 3e-112 | carbohydrate esterase<br>family 16 protein                                   | KIM66770.1   |
| g738.t2  | 62.55% | 4e-114 | carbohydrate esterase<br>family 16 protein                                   | KIM66770.1   |
| g790.t1  | 58.22% | 9e-79  | hypothetical protein                                                         | KAF7761252.1 |
| g790.t2  | 59.60% | 9e-92  | hypothetical protein                                                         | KAF7761252.1 |
| g796.t1  | 40.00% | 2e-04  | hypothetical protein                                                         | KAF7768249.1 |
| g802.t1  |        |        |                                                                              |              |
| g802.t2  |        |        |                                                                              |              |
| g947.t1  |        |        |                                                                              |              |
| g947.t2  |        |        |                                                                              |              |
| g949.t1  | 56.82% | 5e-05  | FAD-binding domain-<br>containing protein                                    | PWN88759.1   |
| g949.t2  | 51.06% | 0.011  | putative oxygen-<br>dependent FAD-linked<br>oxidoreductase family<br>protein | GLB39903.1   |
| g1008.t1 | 76.92% | 3e-26  | CAZyme family AA3                                                            | KAF7777703.1 |
| g1008.t2 | 76.92% | 2e-26  | CAZyme family AA3                                                            | KAF7777703.1 |
| g1011.t1 | 71.79% | 1e-27  | RNI-like protein                                                             | KAF9447166.1 |
| g1011.t2 | 71.79% | 1e-27  | RNI-like protein                                                             | KAF9447166.1 |
| g1068.t1 | 62.25% | 3e-76  | Sterol 3-beta-<br>glucosyltransferase<br>UGT80A2                             | KXN80622.1   |
| g1068.t2 | 62.25% | 1e-77  | Sterol 3-beta-<br>glucosyltransferase<br>UGT80A2                             | KXN80622.1   |
| g1140.t1 | 70.72% | 6e-100 | hypothetical protein                                                         | KAF7777596.1 |
| g1140.t2 | 68.18% | 8e-71  | hypothetical protein                                                         | KAF7777596.1 |
| g1318.t1 | 37.93% | 8e-08  | hypothetical protein                                                         | OGO81950.1   |
| g8979.t1 | 67.35% | 1e-12  | phosphatidylethanolamine<br>N-methyltransferase                              | KAF8816890.1 |
| g8979.t2 | 56.16% | 2e-14  | phosphatidylethanolamine<br>N-methyltransferase                              | KAF8816890.1 |
| g8979.t3 | 55.45% | 2e-24  | phosphatidylethanolamine<br>N-methyltransferase                              | KAF8816890.1 |
| g8995.t1 |        |        |                                                                              |              |
| g8995.t2 |        |        |                                                                              |              |
| g9034.t1 | 52.19% | 2e-101 | cytochrome P450                                                              | EKV43158.1   |
| g9034.t2 | 52.19% | 2e-101 | cytochrome P450                                                              | EKV43158.1   |
| g9194.t1 |        |        |                                                                              |              |
| g9194.t2 |        |        |                                                                              |              |
| g9214.t2 | 66.01% | 0.0    | alcohol dehydrogenase                                                        | KAF9451722.1 |
| g9217.t2 | 66.21% | 0.0    | alcohol dehydrogenase                                                        | KAF9451722.1 |
| g6803.t1 | 32.30% | 1e-14  | hypothetical protein                                                         | KAF7761807.1 |
| g6804.t1 | 31.84% | 7e-17  | hypothetical protein                                                         | KAF7760454.1 |
| g6812.t1 | 60.61% | 9e-04  | hypothetical protein                                                         | EKM76409.1   |
| g6812.t2 | 66.67% | 0.002  | hypothetical protein                                                         | EKM76409.1   |
| g6936.t1 |        |        |                                                                              |              |

|          |        |        |                                                         |              |
|----------|--------|--------|---------------------------------------------------------|--------------|
| g6936.t2 |        |        |                                                         |              |
| g6995.t1 | 71.88% | 0.013  | hypothetical protein                                    | KAG5730867.1 |
| g6995.t2 | 71.88% | 0.013  | hypothetical protein                                    | KAG5730867.1 |
| g6996.t1 |        |        |                                                         |              |
| g6997.t1 |        |        |                                                         |              |
| g6998.t1 |        |        |                                                         |              |
| g7071.t1 |        |        |                                                         |              |
| g7071.t2 |        |        |                                                         |              |
| g7121.t1 |        |        |                                                         |              |
| g7129.t1 | 79.11% | 5e-78  | hypothetical protein                                    | KAF7761547.1 |
| g7130.t2 | 61.11% | 0.011  | hypothetical protein                                    | KAF7761548.1 |
| g7139.t1 | 66.41% | 1e-119 | acetoin reductase family protein                        | KAF9447564.1 |
| g7148.t1 | 63.88% | 6e-132 | O-methylsterigmatocystin oxidoreductase                 | KXN81086.1   |
| g7148.t2 | 53.81% | 7e-139 | O-methylsterigmatocystin oxidoreductase                 | KXN81086.1   |
| g7148.t3 | 59.20% | 1e-112 | O-methylsterigmatocystin oxidoreductase                 | KXN81086.1   |
| g51.t1   |        |        |                                                         |              |
| g51.t2   |        |        |                                                         |              |
| g87.t1   | 71.83% | 3e-29  | hypothetical protein                                    | KAF7759616.1 |
| g184.t1  | 73.91% | 6e-28  | hypothetical protein                                    | KAF7759616.1 |
| g189.t1  | 81.31% | 1e-104 | hypothetical protein                                    | KAF7759931.1 |
| g189.t2  | 82.32% | 2e-108 | hypothetical protein                                    | KAF7759931.1 |
| g6110.t1 |        |        |                                                         |              |
| g6110.t2 | 43.02% | 3e-13  | hypothetical protein                                    | KAF7760353.1 |
| g6153.t1 |        |        |                                                         |              |
| g6153.t2 |        |        |                                                         |              |
| g6153.t3 |        |        |                                                         |              |
| g6236.t1 | 90.13% | 2e-87  | B-(1-6) glucan synthase                                 | EKV48912.1   |
| g6236.t2 | 90.13% | 2e-87  | B-(1-6) glucan synthase                                 | EKV48912.1   |
| g6281.t1 |        |        |                                                         |              |
| g6286.t1 | 69.34% | 2e-54  | hypothetical protein                                    | KAF7773209.1 |
| g6287.t1 |        |        |                                                         |              |
| g6289.t1 |        |        |                                                         |              |
| g3123.t1 |        |        |                                                         |              |
| g3132.t1 | 81.03% | 2e-104 | hypothetical protein                                    | KAF7761547.1 |
| g3133.t2 | 45%    | 0.011  | hypothetical protein                                    | KAF7761548.1 |
| g3142.t1 | 66.41% | 1e-119 | acetoin reductase family protein                        | KAF9447564.1 |
| g3023.t1 | 75.36% | 3e-28  | RAD26-like SNF2 family DNA-dependent ATPase             | KAF8346616.1 |
| g3023.t2 | 75.36% | 3e-28  | RAD26-like SNF2 family DNA-dependent ATPase             | KAF8346616.1 |
| g3057.t1 | 97.26% | 2e-38  | salt tolerance down-regulator-domain-containing protein | KAF8970654.1 |
| g3057.t2 | 97.26% | 2e-38  | salt tolerance down-regulator-domain-containing protein | KAF8970654.1 |
| g3069.t1 | 69.47% | 8e-32  | CAZyme family CE10                                      | KAF7759817.1 |
| g3069.t2 | 69.47% | 6e-32  | CAZyme family CE10                                      | KAF7759817.1 |

|          |        |       |                                                  |              |
|----------|--------|-------|--------------------------------------------------|--------------|
| g3113.t1 | 59.17% | 5e-68 | hypothetical protein                             | KAF4610720.1 |
| g1337.t1 | 58.52% | 0.0   | hypothetical protein                             | KAF7783396.1 |
| g1337.t2 | 57.50% | 0.0   | hypothetical protein                             | KAF7783396.1 |
| g1346.t1 | 68.31% | 0.0   | hypothetical protein                             | KAF7783396.1 |
| g1346.t2 | 68.07% | 0.0   | hypothetical protein                             | KAF7783396.1 |
| g1381.t1 | 68.50% | 0.0   | hypothetical protein                             | KAF7785221.1 |
| g1381.t2 | 68.99% | 0.0   | hypothetical protein                             | KAF7785221.1 |
| g8832.t1 |        |       |                                                  |              |
| g8832.t2 |        |       |                                                  |              |
| g8851.t1 |        |       |                                                  |              |
| g8851.t2 |        |       |                                                  |              |
| g8851.t3 |        |       |                                                  |              |
| g8853.t1 | 82.99% | 9e-81 | hypothetical protein                             | EKM84331.1   |
| g8861.t1 |        |       |                                                  |              |
| g8861.t2 |        |       |                                                  |              |
| g8861.t3 |        |       |                                                  |              |
| g1.t1    | 86.89% | 2e-28 | hypothetical protein                             | KAF7761647.1 |
| g1.t2    | 88.06% | 9e-33 | hypothetical protein                             | KAF7761647.1 |
| g5.t1    |        |       |                                                  |              |
| g5.t2    |        |       |                                                  |              |
| g10.t1   |        |       |                                                  |              |
| g10.t2   | 46.91% | 3e-11 | hypothetical protein                             | KAF7762179.1 |
| g10.t3   | 53.45% | 1e-08 | hypothetical protein                             | KAF7762179.1 |
| g38.t1   | 60.36% | 1e-55 | ubiquitin-conjugating<br>enzyme/RWD-like protein | KAJ4494584.1 |
| g38.t2   | 55.32% | 9e-37 | ubiquitin-conjugating<br>enzyme/RWD-like protein | KAJ4494584.1 |

The analysis result of the entry with a blank comment result is "No significant similarity found".

**Table S14. Homologous genes of *A. bisporus* fruiting body development related genes in *A. bitorquis* BH01.**

| Protein ID | Predicted function         | E Value          | Identities | Accession No.      | References |
|------------|----------------------------|------------------|------------|--------------------|------------|
| g7269.t1   | polyphenoloxidase          | 0.0              | 92%        | GU936494           | [1]        |
| g7229.t1   |                            | $e^{-160}$       | 53%        |                    |            |
| g7210.t1   |                            | $e^{-141}$       | 33%        |                    |            |
| g7210.t1   | polyphenoloxidase          | 0.0 <sup>3</sup> | 72%        | GU936493           | [1]        |
| g7269.t1   |                            | $e^{-151}$       | 47%        |                    |            |
| g7229.t1   |                            | $e^{-117}$       | 49%        |                    |            |
| g6263.t2   | urease                     | 0.0              | 96%        | AJ748112           | [2]        |
| g6263.t1   |                            | 0.0              | 96%        |                    |            |
| g8566.t1   | ATP-synthase delta-subunit | $4e^{-83}$       | 96%        | CAB04785.1         | [3]        |
| g8615.t1   | cell division control      | $2e^{-086}$      | 98%        | CAB04784.1         | [3]        |
| g4300.t1   |                            | $3e^{-057}$      | 67%        |                    |            |
| g4096.t1   |                            | $6e^{-025}$      | 41%        |                    |            |
| g7779.t1   | hypothetical protein       | $1e^{-47}$       | 81%        | AGABI2DRAFT_117525 | [4]        |
| g7794.t1   |                            | $3e^{-45}$       | 63%        |                    |            |
| g1808.t1   | hypothetical protein       | 0.0              | 86%        | AGABI2DRAFT_119457 | [4]        |
| g3058.t1   |                            | $4e^{-24}$       | 32%        |                    |            |
| g7264.t1   |                            | $8e^{-24}$       | 31%        |                    |            |
| g8587.t1   | hypothetical protein       | $e^{-115}$       | 91%        | AGABI2DRAFT_117665 | [4]        |
| g9004.t1   | hypothetical protein       | $e^{-130}$       | 51%        | AGABI2DRAFT_194024 | [4]        |
| g674.t1    |                            | $e^{-125}$       | 87%        |                    |            |
| g671.t1    |                            | $e^{-114}$       | 77%        |                    |            |
| g668.t1    |                            | $e^{-113}$       | 84%        |                    |            |
| g553.t1    | hypothetical protein       | 0.0              | 91%        | AGABI2DRAFT_188444 | [4]        |
| g8011.t1   | hypothetical protein       | $1e^{-087}$      | 89%        | AGABI2DRAFT_136361 | [4]        |
| g4325.t1   |                            | $1e^{-027}$      | 45%        |                    |            |
| g2507.t1   | hypothetical protein       | $6e^{-040}$      | 76%        | AGABI2DRAFT_138343 | [4]        |
| g2600.t1   |                            | $7e^{-040}$      | 66%        |                    |            |
| g2508.t1   |                            | $1e^{-035}$      | 71%        |                    |            |

| Descriptions                                                                                                                                                              | Graphic Summary                    | Alignments | Taxonomy    |             |         |            |          |                            |
|---------------------------------------------------------------------------------------------------------------------------------------------------------------------------|------------------------------------|------------|-------------|-------------|---------|------------|----------|----------------------------|
| Sequences producing significant alignments                                                                                                                                |                                    |            |             |             |         |            |          |                            |
| Download Select columns Show 100                                                                                                                                          |                                    |            |             |             |         |            |          |                            |
| <input checked="" type="checkbox"/> select all 100 sequences selected                                                                                                     |                                    |            |             |             |         |            |          |                            |
| <a href="#">GenBank</a> <a href="#">Graphics</a> <a href="#">Distance tree of results</a> <a href="#">MSA Viewer</a>                                                      |                                    |            |             |             |         |            |          |                            |
| Description                                                                                                                                                               | Scientific Name                    | Max Score  | Total Score | Query Cover | E value | Per. Ident | Acc. Len | Accession                  |
| <input checked="" type="checkbox"/> <a href="#">Agaricus bitorquis strain m6 internal transcribed spacer 1, partial sequence: 5.8S ribosomal RNA gene and interna...</a>  | <a href="#">Agaricus bitorquis</a> | 1260       | 1260        | 98%         | 0.0     | 99.57%     | 740      | <a href="#">KY401339.1</a> |
| <input checked="" type="checkbox"/> <a href="#">Agaricus bitorquis voucher ZRL20190040 small subunit ribosomal RNA gene, partial sequence: internal transcribe...</a>     | <a href="#">Agaricus bitorquis</a> | 1260       | 1260        | 98%         | 0.0     | 99.57%     | 752      | <a href="#">MW555377.1</a> |
| <input checked="" type="checkbox"/> <a href="#">Agaricus bitorquis voucher ZRL20190039 internal transcribed spacer 1, partial sequence: 5.8S ribosomal RNA ge...</a>      | <a href="#">Agaricus bitorquis</a> | 1260       | 1260        | 98%         | 0.0     | 99.42%     | 739      | <a href="#">MW555376.1</a> |
| <input checked="" type="checkbox"/> <a href="#">Agaricus bitorquis voucher ZRL20190020 small subunit ribosomal RNA gene, partial sequence: internal transcribe...</a>     | <a href="#">Agaricus bitorquis</a> | 1260       | 1260        | 98%         | 0.0     | 99.57%     | 758      | <a href="#">MW555361.1</a> |
| <input checked="" type="checkbox"/> <a href="#">Agaricus bitorquis strain m7 internal transcribed spacer 1, partial sequence: 5.8S ribosomal RNA gene and interna...</a>  | <a href="#">Agaricus bitorquis</a> | 1254       | 1254        | 98%         | 0.0     | 99.42%     | 736      | <a href="#">KY401340.1</a> |
| <input checked="" type="checkbox"/> <a href="#">Agaricus bitorquis strain a4 internal transcribed spacer 1, partial sequence: 5.8S ribosomal RNA gene and interna...</a>  | <a href="#">Agaricus bitorquis</a> | 1254       | 1254        | 97%         | 0.0     | 99.71%     | 739      | <a href="#">KY401335.1</a> |
| <input checked="" type="checkbox"/> <a href="#">Agaricus bitorquis voucher ZRL20190047 small subunit ribosomal RNA gene, partial sequence: internal transcribe...</a>     | <a href="#">Agaricus bitorquis</a> | 1254       | 1254        | 98%         | 0.0     | 99.28%     | 760      | <a href="#">MW555384.1</a> |
| <input checked="" type="checkbox"/> <a href="#">Agaricus bitorquis isolate EGDA-A1 small subunit ribosomal RNA gene, partial sequence: internal transcribed spa...</a>    | <a href="#">Agaricus bitorquis</a> | 1254       | 1254        | 98%         | 0.0     | 99.42%     | 752      | <a href="#">MW915591.1</a> |
| <input checked="" type="checkbox"/> <a href="#">Agaricus bitorquis strain g1 internal transcribed spacer 1, partial sequence: 5.8S ribosomal RNA gene and interna...</a>  | <a href="#">Agaricus bitorquis</a> | 1253       | 1253        | 98%         | 0.0     | 99.42%     | 740      | <a href="#">KY401331.1</a> |
| <input checked="" type="checkbox"/> <a href="#">Agaricus bitorquis voucher ZRL20190037 small subunit ribosomal RNA gene, partial sequence: internal transcribe...</a>     | <a href="#">Agaricus bitorquis</a> | 1253       | 1253        | 97%         | 0.0     | 99.56%     | 735      | <a href="#">MW555374.1</a> |
| <input checked="" type="checkbox"/> <a href="#">Agaricus bitorquis genomic DNA containing ITS1, 5.8S rRNA gene and ITS2, strain EGW1, isolate 5</a>                       | <a href="#">Agaricus bitorquis</a> | 1251       | 1251        | 97%         | 0.0     | 99.56%     | 754      | <a href="#">LK024176.1</a> |
| <input checked="" type="checkbox"/> <a href="#">Agaricus bitorquis strain m14 small subunit ribosomal RNA gene, partial sequence: internal transcribed spacer 1, 5...</a> | <a href="#">Agaricus bitorquis</a> | 1249       | 1249        | 97%         | 0.0     | 99.56%     | 741      | <a href="#">KY401341.1</a> |

**Figure S1. ITS alignment of the strain BH01.**

The ITS of strain BH01 was aligned to the nr database of NCBI.

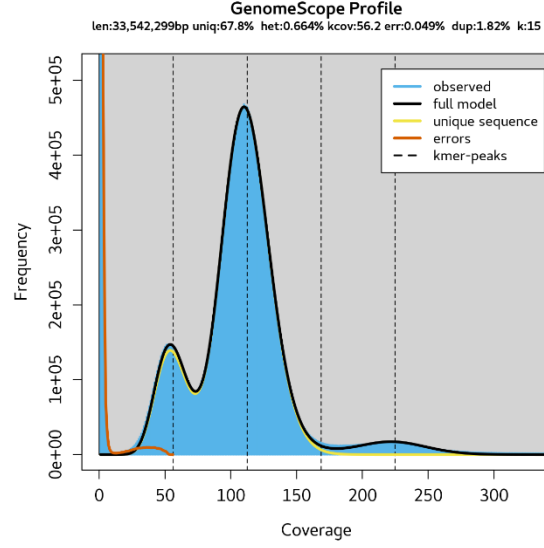

**Figure S2. K-mer-Depth and K-mer Species-Frequency Distribution Plot.**

The blue line represents the actual  $K$ -mer curve, the black line is the  $k$ -mer curve estimated by the model, the yellow line is the  $K$ -mer curve corresponding to the unique data, the red line represents the error curve due to sequencing errors, and the dashed line represents speculation  $K$ -mer peak.

Using the reads obtained by sequencing,  $K$ -mer-based analysis was used to estimate the genome size and heterozygosity. A  $K$ -mer refers to a sequence of  $K$  bp in length. Iteratively select a sequence of length  $K$  bases from a continuous sequence. If the length of the sequence is  $L$  and the length of the  $K$ -mer is  $K$ , then  $L-K+1$   $K$ -mers can be obtained. We take  $K$ -mers for the reads obtained by sequencing, and then count the frequency of each  $K$ -mer. According to the Lander\_waterman algorithm, the genome size ( $G$ ) satisfies the following formula:

$$C_{base} = C_{k-mer} \times \frac{L}{L - K + 1}$$

$$G = \frac{n_{k-mer}}{C_{k-mer}} = \frac{n_{base}}{C_{base}}$$

$C_{base}$  and  $C_{k-mer}$  are the expected depth of coverage and  $K$ -mer, and  $n_{base}$  and  $n_{k-mer}$  are the total number of bases and the total number of  $K$ -mers in the sequence. In the case of a certain amount of data, the depth frequency of  $K$ -mer is subject to Poisson distribution, so the peak of the  $K$ -mer depth frequency distribution is the corresponding depth, which is used as an estimate of the expected depth of  $K$ -mer.



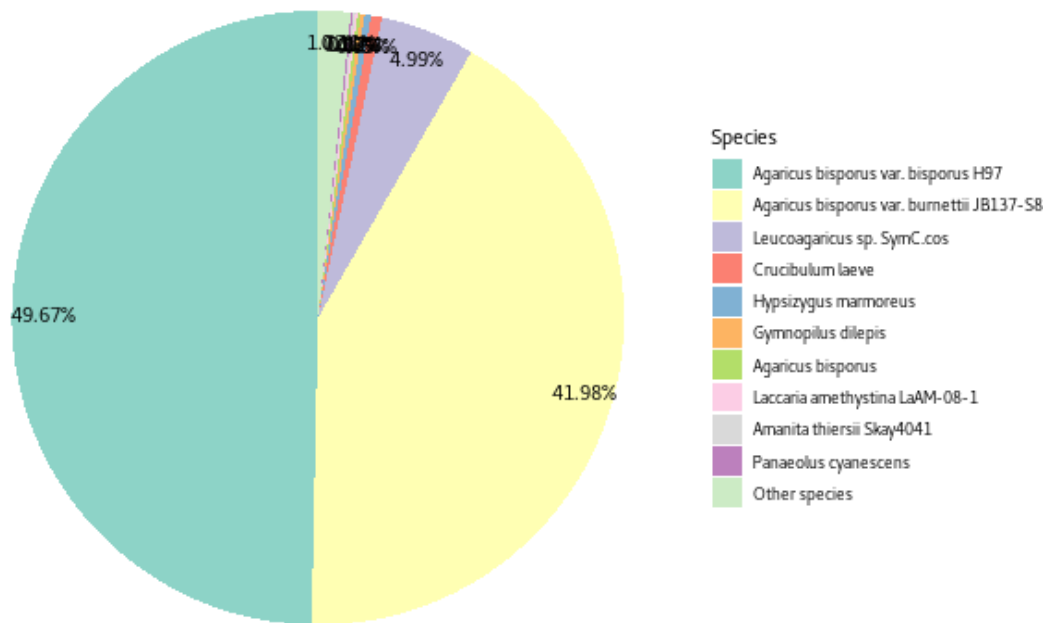

**Figure S3. Species distribution map of Nr database alignment to sequences.**

According to the results of the Nr library match, the top 10 species were counted and the rest were classified as other species, and the distribution of these species was mapped according to their proportion.

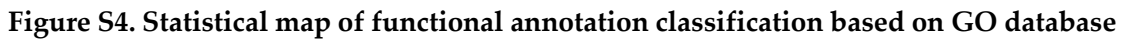

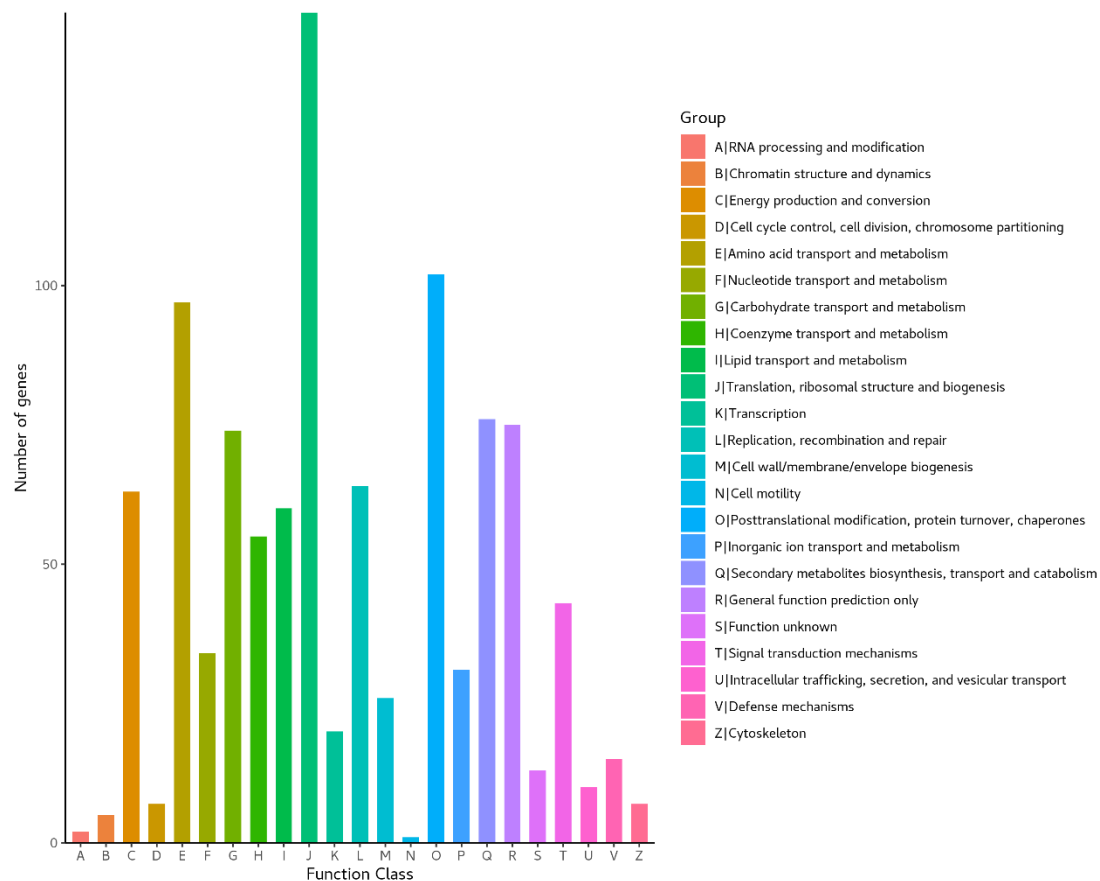

**Figure S5. Statistical Chart of COG Functional Annotated Classification.**

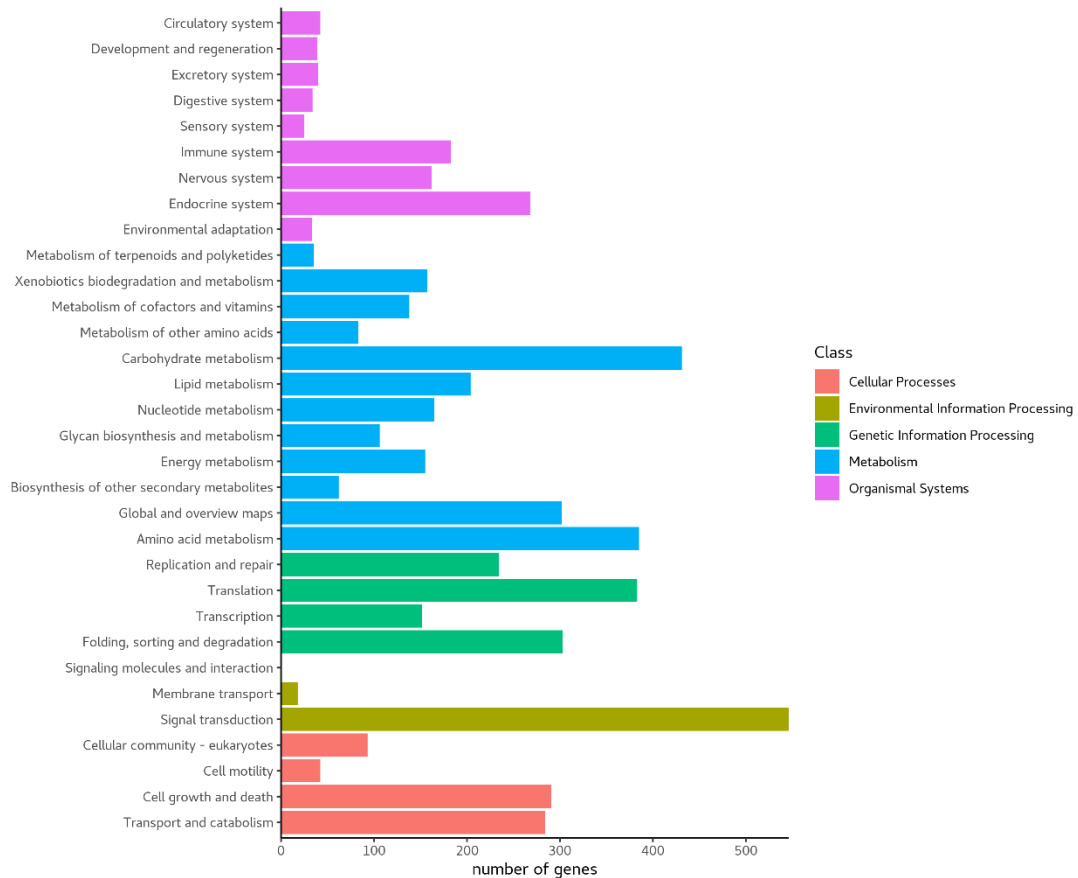

**Figure S6. KEGG Pathway Functional Classification Chart.**

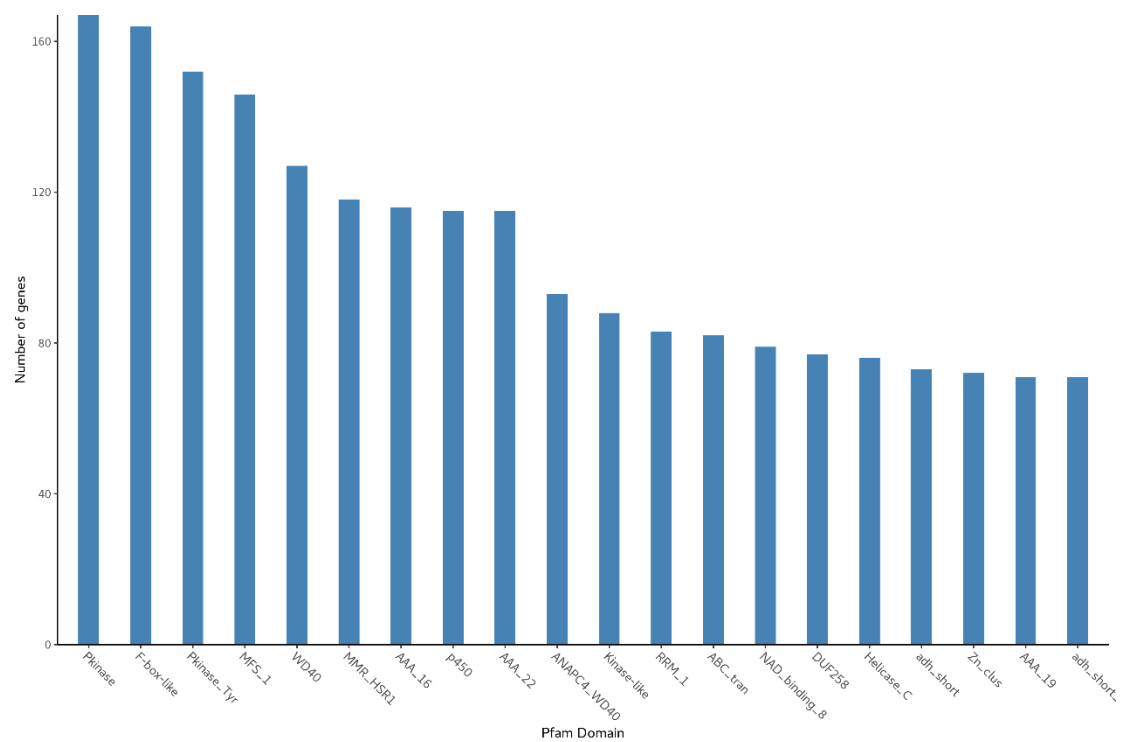

**Figure S7. Domain annotation based on the Pfam database.**

Statistical summaries of genes annotated for each domain are made and the top 20 most annotated domains are plotted.

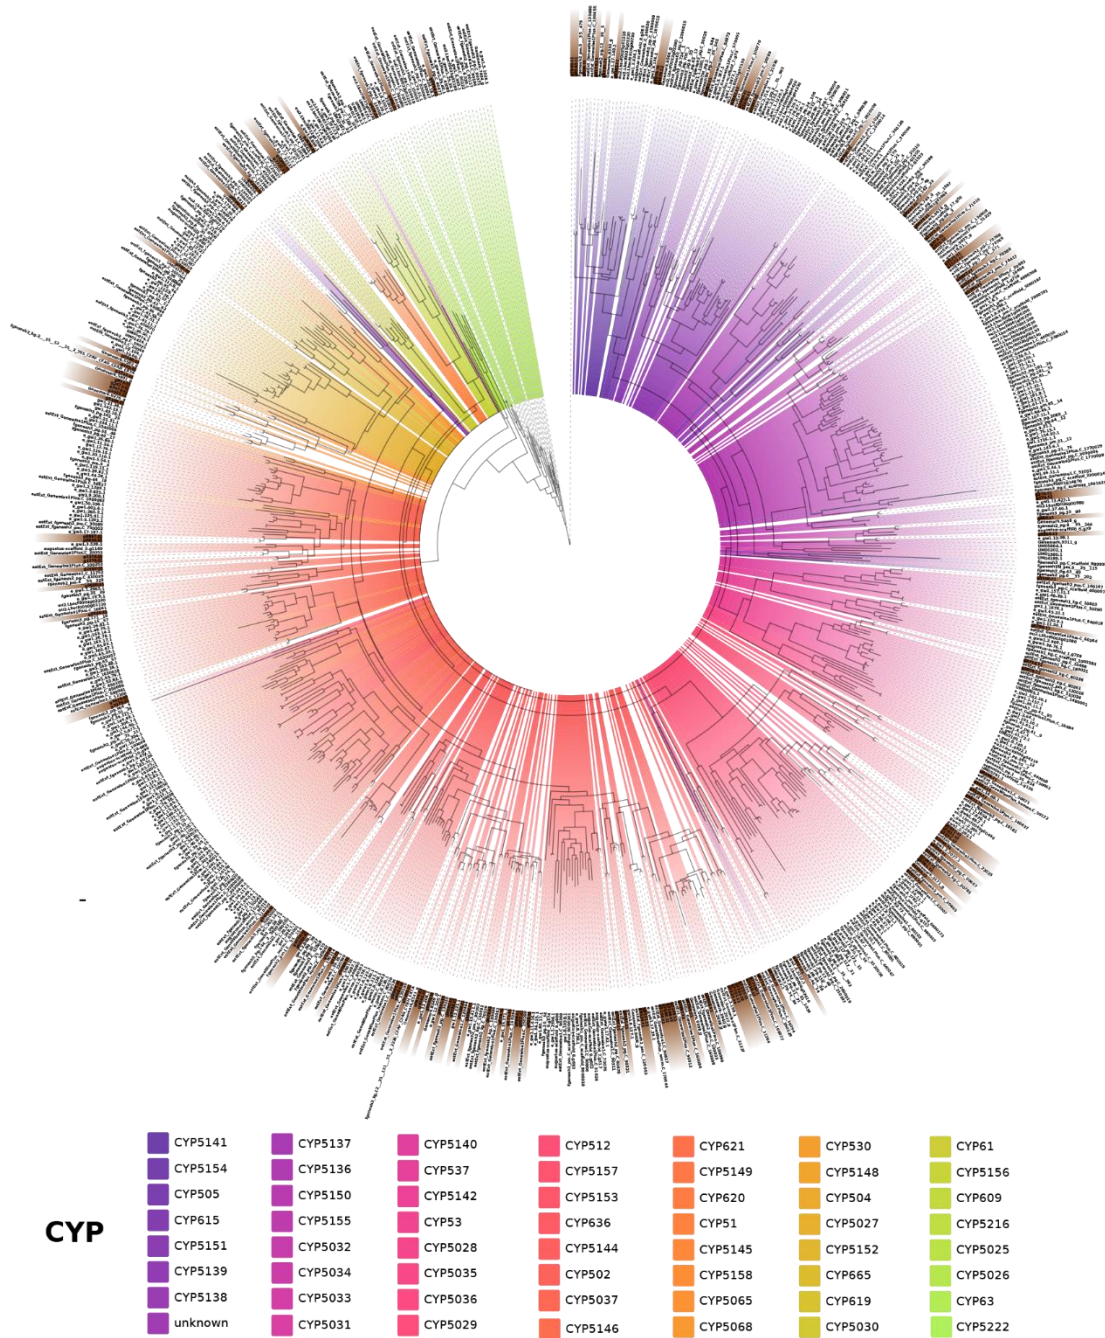

**Figure S8. P450s Cluster analysis of *A. bitorquis* BH01 and other Basidiomycetes.**

The sequences of the branch with color background and the corresponding sequence name without background are from Fungal Cytochrome P450 Database (<http://passport.riceblast.snu.ac.kr/?t=P450>). The background color of the branch corresponds to the category to which it belongs. The sequences with dark brown background and corresponding branch without background are P450 sequences from *A. bitorquis* BH01. Multiple sequence pairs are implemented with mafft v7.505 with parameters --maxiterate 1000 --localpair. The evolutionary tree was constructed by IQtree v2.2.3[5] with the parameters -m MFP -bb 1000 -alrt 1000 -abayes -nt AUTO.

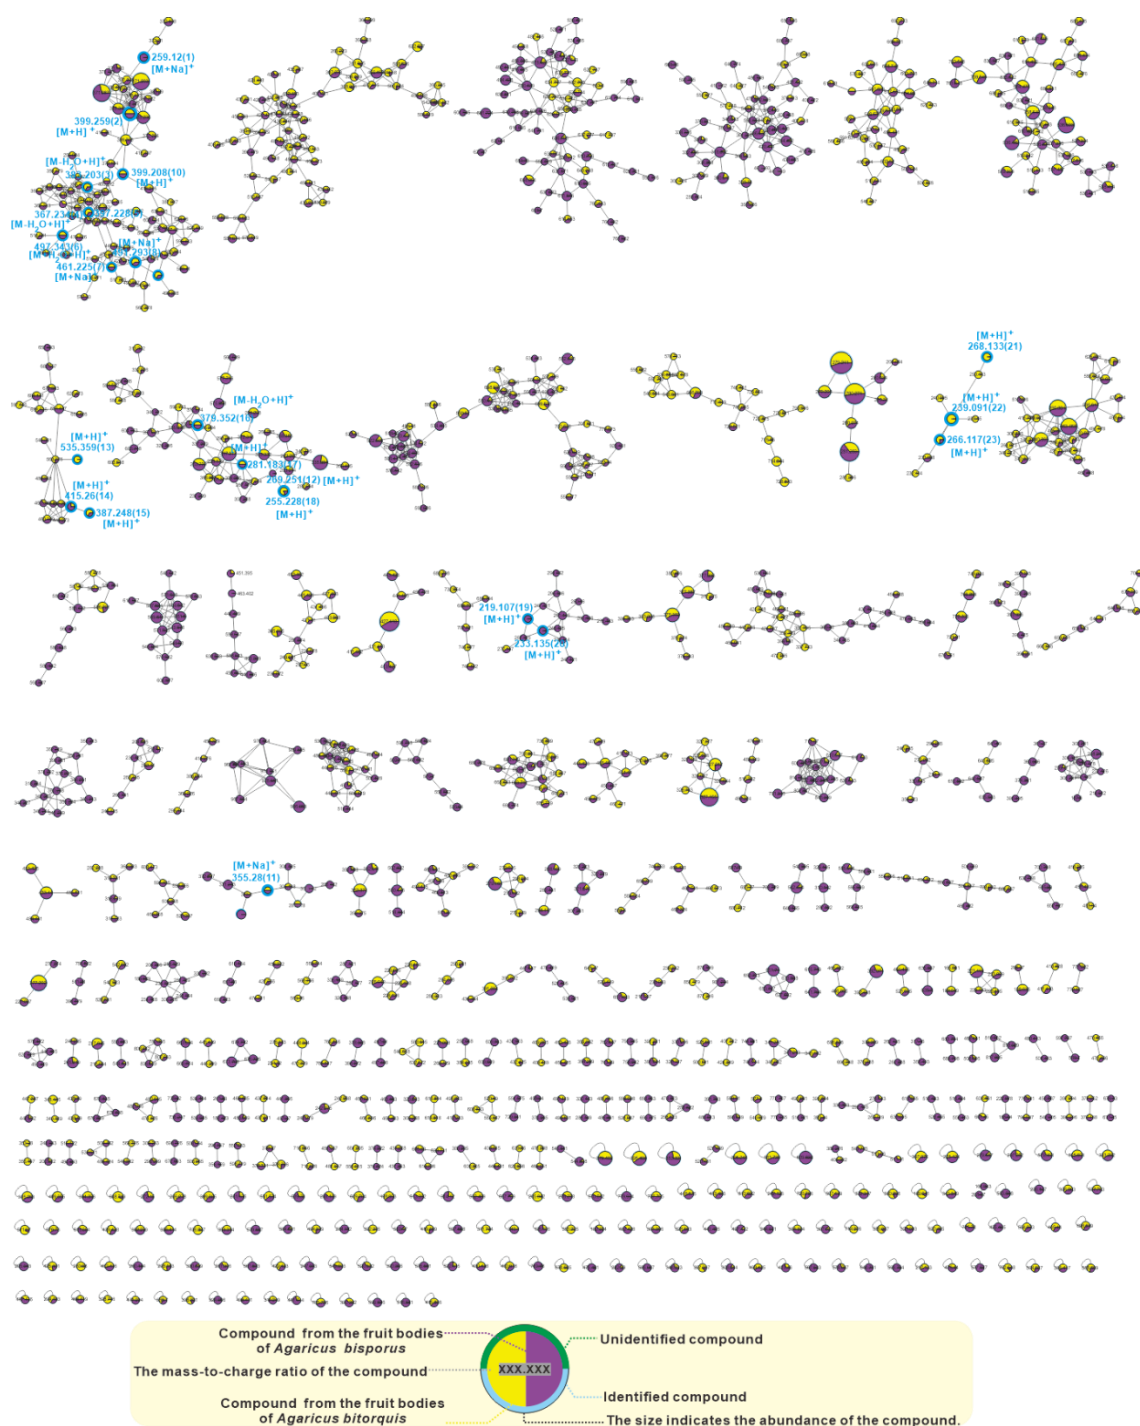

**Figure S9.** Molecular network analysis of metabolites from the fruiting bodies of *A. bitorquis* and *A. bisporus*.



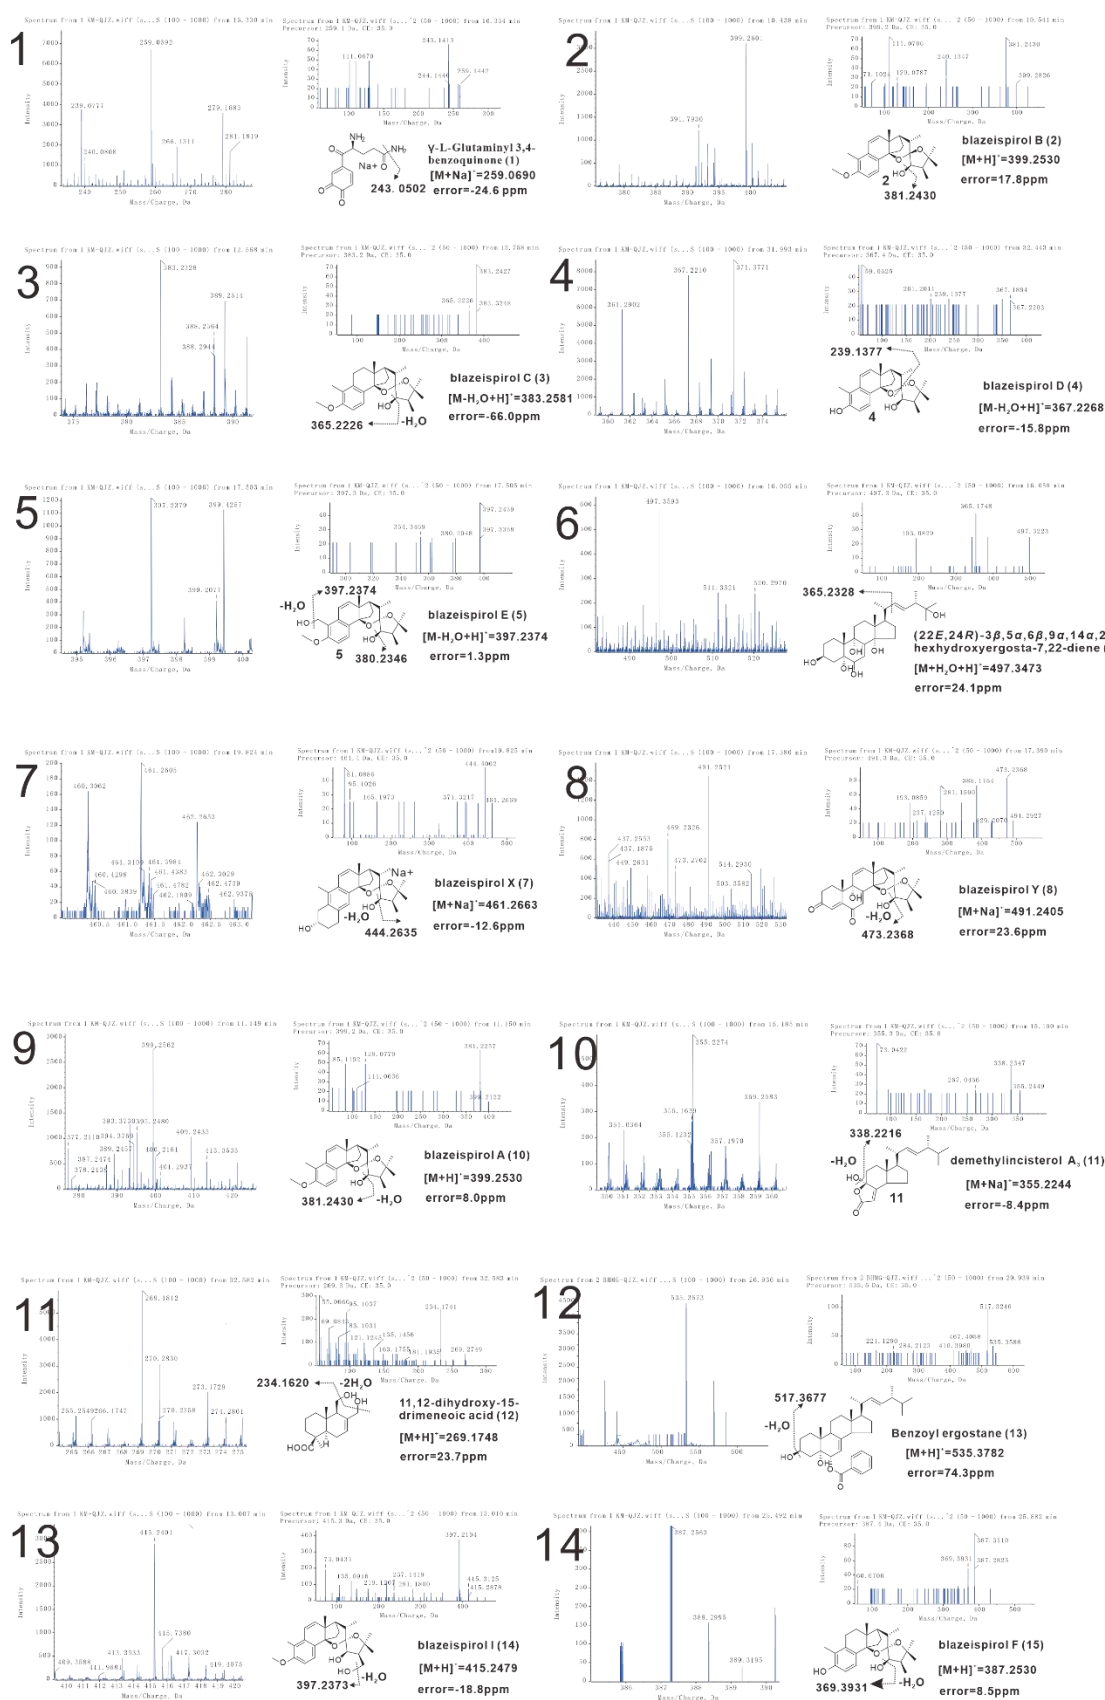



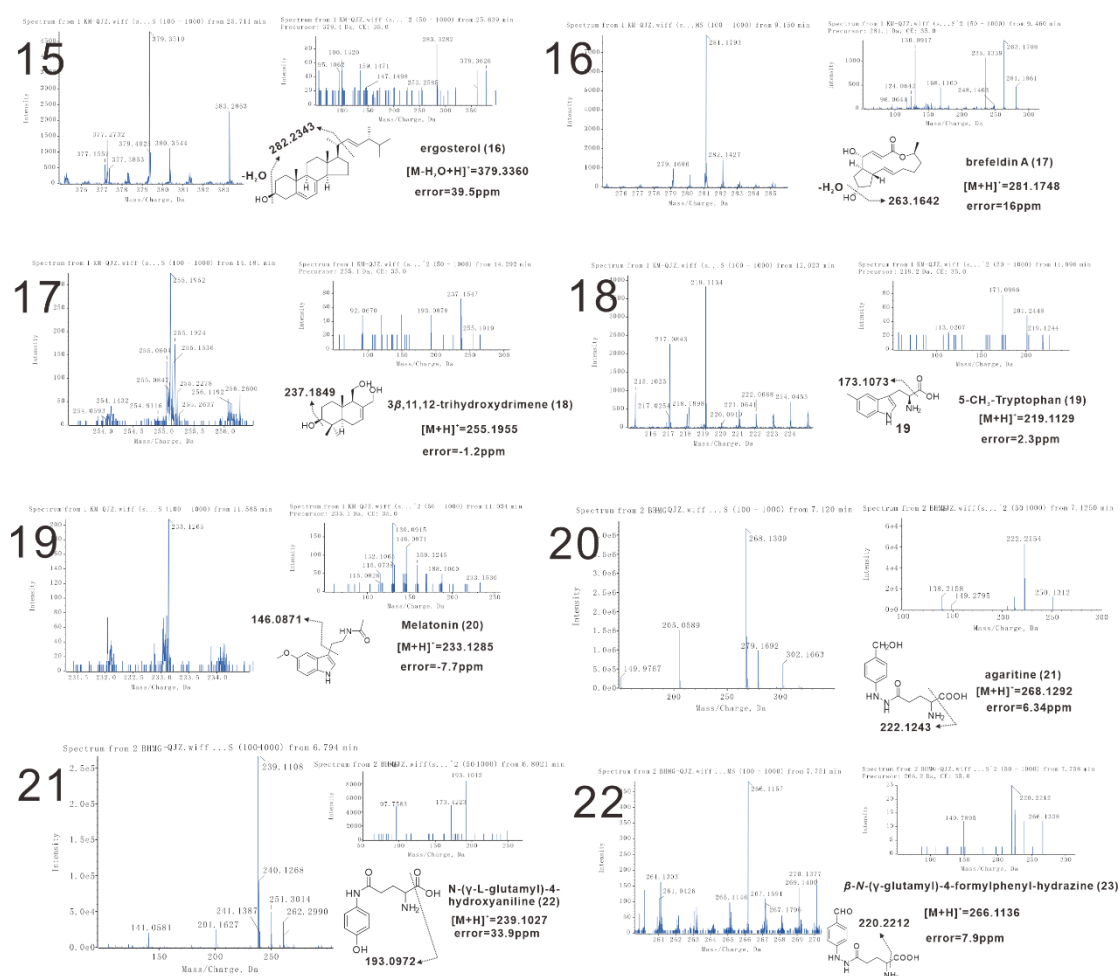

**Figure S10. The LC-ESI-HRMS and LC-ESI-HRMS/MS spectrums of isolates from the fruiting bodies of *A. bitorquus* and *A. bisporus*.**

Mass spectral data were acquired in positive ion mode.

The spectrum numbers correspond to the compound numbers in the manuscript.

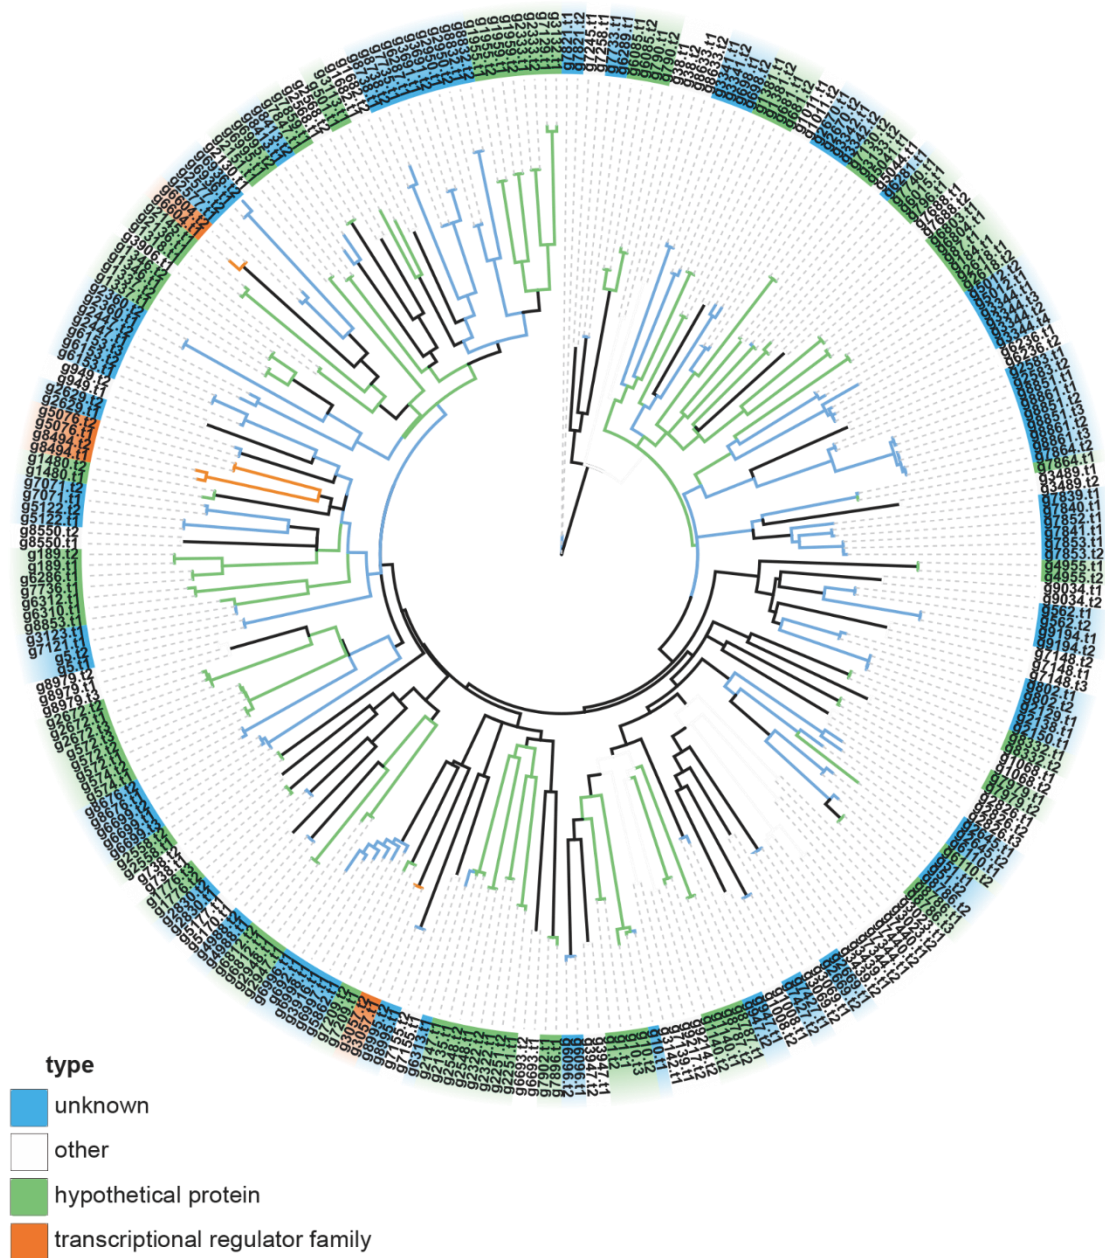

Figure S11. Clustering analysis of orthologous genes unique to *A. bitorquis* BH01.

## References

1. Li, N.-y.; Cai, W.-m.; Jin, Q.-l.; Qin, Q.-p.; Ran, F.-l. Molecular Cloning and Expression of Polyphenoloxidase Genes from the Mushroom, *Agaricus bisporus*. *Agricultural Sciences in China* **2011**, *10*, 185-194, doi:10.1016/S1671-2927(09)60305-9.
2. Wagemaker, M.J.M.; Eastwood, D.C.; van der Drift, C.; Jetten, M.S.M.; Burton, K.; Van Griensven, L.J.L.D.; Op den Camp, H.J.M. Expression of the urease gene of *Agaricus bisporus*: a tool for studying fruit body formation and post-harvest development. *Applied Microbiology and Biotechnology* **2006**, *71*, 486-492, doi:10.1007/s00253-005-0185-5.
3. De Groot, P.W.J.; Schaap, P.J.; Van Griensven, L.J.L.D.; Visser, J. Isolation of developmentally regulated genes from the edible mushroom *Agaricus bisporus*. *Microbiology* **1997**, *143*, 1993-2001, doi:10.1099/00221287-143-6-1993.
4. Yuan, S.; Qiuhui, H.; Anxiang, S.; Fei, P.; Gaoxing, M.; Ning, M.; Wenjian, Y. Transcriptomic Analysis of the Mechanism Underlying the Effect of Methyl Jasmonate on the Size of *Agaricus bisporus*. *Food Science* **2021**, *42*, 130-137, doi:10.7506/spkx1002-6630-20200720-258.
5. Minh, B.Q.; Schmidt, H.A.; Chernomor, O.; Schrempf, D.; Woodhams, M.D.; von Haeseler, A.; Lanfear, R. IQ-TREE 2: New Models and Efficient Methods for Phylogenetic Inference in the Genomic Era. *Molecular Biology and Evolution* **2020**, *37*, 1530-1534, doi:10.1093/molbev/msaa015.
